# Supplementary material for: Safety-netting strategies for primary and emergency care: a codesign study with patients, carers and clinicians in Sweden
Source: PubMed Central journal article supplement (PMC11308890; doi:10.1136/bmjopen-2024-089224), 2024-08-05
Supplement: bmjopen-14-8-s001.pdf [file bmjopen-14-8-s001.pdf]

## Appendix 1 – Participant and research team characteristics

Table 1. Participant characteristics

| ID       | Role               | Gender | Clinical expertise/Years of healthcare experience <sup>1</sup> | Participation |     |       |                 |
|----------|--------------------|--------|----------------------------------------------------------------|---------------|-----|-------|-----------------|
|          |                    |        |                                                                | FGD           | Int | WS no | Total frequency |
| P01      | Patient            | f      | 9 years                                                        | Yes           |     | 1     | 2               |
| P02      | Patient            | f      | missing                                                        | Yes           |     |       | 1               |
| P03      | Informal caregiver | m      | 8 years                                                        | Yes           |     | 1,2   | 3               |
| P04      | Patient            | f      | 7 years                                                        | Yes           |     |       | 1               |
| P05      | Patient            | m      | 10 years                                                       | Yes           |     |       | 1               |
| P06      | Patient            | f      | 31 years                                                       | Yes           | Yes | 2,4,5 | 5               |
| P07      | Patient            | m      | 35 years                                                       | Yes           | Yes | 2–5   | 6               |
| P08      | Patient            | f      | 6 years                                                        | Yes           | Yes | 1,3,4 | 5               |
| L01      | Clinician          | f      | Primary care specialist                                        | Yes           | Yes | 4     | 3               |
| L02      | Clinician          | f      | Primary care specialist                                        | Yes           |     |       | 1               |
| L03      | Clinician          | f      | Primary care specialist                                        | Yes           | Yes |       | 2               |
| L04      | Clinician          | f      | Emergency care specialist                                      | Yes           |     |       | 1               |
| L05      | Clinician          | f      | Primary care specialist and emergency care resident            | Yes           | Yes | 2–4   | 5               |
| L06      | Clinician          | f      | Primary care specialist                                        | Yes           | Yes |       | 2               |
| L07      | Clinician          | m      | Primary care specialist                                        | Yes           |     |       | 1               |
| L08      | Clinician          | m      | Primary care resident                                          | Yes           |     |       | 1               |
| L09      | Clinician          | f      | Primary care specialist                                        | Yes           |     |       | 1               |
| L10/L11* | Clinician          | m      | Emergency care specialist                                      |               | Yes | 1     | 2               |
| L12      | Clinician          | m      | Primary care specialist                                        |               |     | 1,3,5 | 3               |
| L13      | Clinician          | f      | Primary care resident                                          |               |     | 1,2   | 2               |
| L14      | Clinician          | f      | Emergency care/paediatric care specialist                      |               |     | 1     | 1               |
| L15      | Clinician          | f      | Primary care resident                                          |               |     | 1,3–5 | 4               |
| L16      | Clinician          | m      | Primary care resident                                          |               |     | 4     | 4               |
| L17      | Clinician          | f      | Primary care specialist                                        |               |     | 3     | 3               |
| L18      | Clinician          | f      | Primary care specialist                                        |               |     | 1,4,5 | 3               |
| L19      | Clinician          | m      | Primary care specialist                                        |               |     | 1,4,5 | 3               |

Notes. 1) For patients and informal caregivers, we report the years of experience with routine healthcare contacts (i.e., at least one consultation per year). FGD = Focus group discussion, Int = Interview, WS no = workshop number (1-5), f = female, m = male. \*One of the participants mistakenly got two ID numbers.

## Research team

The research team (all female) consisted of the five co-authors and one research assistant with a nursing background who contributed to data collection (interviews and workshops) and analysis. The research team shares a devotion to quality improvement in healthcare and patient safety. CW and SR have a particular interest in digital health technologies. The authors' credentials and occupations at the time of the study were as follows: CW (PhD, associate professor in health informatics) and SR (PhD, researcher in health informatics and patient researcher) had full-time research appointments; apart from their research occupations, KPH (MD, PhD, associate professor in patient safety) worked as a pediatric emergency specialist and patient safety expert and RF (MD, PhD) as a general practitioner and quality improvement specialist; JH (MD) had just completed her medical studies and was employed as a research assistant. The research team has many years of experience with qualitative research as well as co-design studies. During data collection, the researchers briefly presented to participants their occupations as well as the main purpose of the research project. KPH and RF were professionally acquainted with some of the participating clinicians and SR with some of the participating patients/carers.
