# Supplementary material for: Safety-netting strategies for primary and emergency care: a codesign study with patients, carers and clinicians in Sweden
Source: PubMed Central journal article supplement (PMC11308890; doi:10.1136/bmjopen-2024-089224), 2024-08-05
Supplement: bmjopen-14-8-s002.pdf [file bmjopen-14-8-s002.pdf]

## Appendix 2 – Overview of the co-design workshops

Table 1 provides an overview of the general time schedule and structure of the five co-design workshops. Table 2 provides an overview of the workshop aims<sup>1</sup>, guiding questions and activities for each workshop session, and workshop outputs produced by the participants.

**Table 1.** General time schedule and structure of the workshops.

| Time   | Activities                                                                                                              |
|--------|-------------------------------------------------------------------------------------------------------------------------|
| 20 min | Introduction of co-design and workshop aim<br>Participant introduction                                                  |
| 20 min | Presentation of results from prior sessions<br>Group session 1 (2 mixed groups, including service users and clinicians) |
| 10 min | Summary from the group session 1                                                                                        |
| 5 min  | Break                                                                                                                   |
| 20 min | Group session 2 (2 mixed groups, including service users and clinicians)                                                |
| 10 min | Summary from the group session 2                                                                                        |
| 5 min  | Check-out                                                                                                               |

**Table 2.** Workshop aims, session details, and outputs.

| WS | Aims                                                                                                                                                                                                                                                             | Sessions |                                                                                                                                      |                                                                            | Outputs                                                                                                                                            |
|----|------------------------------------------------------------------------------------------------------------------------------------------------------------------------------------------------------------------------------------------------------------------|----------|--------------------------------------------------------------------------------------------------------------------------------------|----------------------------------------------------------------------------|----------------------------------------------------------------------------------------------------------------------------------------------------|
|    |                                                                                                                                                                                                                                                                  | No       | Guiding questions                                                                                                                    | Activities                                                                 |                                                                                                                                                    |
| 1  | <ul style="list-style-type: none"> <li>- To create a shared idea of what safety-netting implies in the patient-clinician consultation</li> <li>- To set goals for what safety-netting should accomplish</li> </ul>                                               | 1        | What does safety-netting in the patient-doctor consultation imply? Try to give concrete examples.                                    | Group discussion                                                           | <ul style="list-style-type: none"> <li>- Padlet board with participants' individual reflections collected during summary/check-out</li> </ul>      |
|    |                                                                                                                                                                                                                                                                  | 2        | What would you want safety-netting to result in for the patient and the clinician? In other words, what are we trying to accomplish? | Group discussion                                                           |                                                                                                                                                    |
| 2  | <ul style="list-style-type: none"> <li>- To figure out how safety-netting can be integrated practically in the patient-clinician consultation</li> <li>- To agree on necessary content for an education aimed at supporting the use of safety-netting</li> </ul> | 3        | How can one integrate safety-netting practically in the patient-clinician encounter?                                                 | Group discussion                                                           | <ul style="list-style-type: none"> <li>- Participants' individual summaries of key points (shared in the chat during summary/check-out)</li> </ul> |
|    |                                                                                                                                                                                                                                                                  | 4        | What should an education for clinicians contain to stimulate and support the use of safety-netting? Theory & practice                | Group discussion                                                           |                                                                                                                                                    |
| 3  | <ul style="list-style-type: none"> <li>- To collaboratively design a format for safety-netting advice based on a number of symptom-based cases</li> </ul>                                                                                                        | 5        | Based on a case description, design a proposal for safety-netting advice                                                             | Design exercise (group A: primary care case; group B: emergency care case) | <ul style="list-style-type: none"> <li>- Word documents with suggestions for safety-netting</li> </ul>                                             |

<sup>1</sup> Note that the co-design workshops had a dual purpose to develop both safety-netting strategies and educational content for a safety-netting course for clinicians. The full details are provided here for the purpose of comprehensiveness. However, in the analysis for this study, we have focused on safety-netting strategies and have left out data related specifically to educational content.

| WS | Aims                                                                                                                                                                                      | Sessions |                                                                       |                                                                            |                                                                                                                                                     |
|----|-------------------------------------------------------------------------------------------------------------------------------------------------------------------------------------------|----------|-----------------------------------------------------------------------|----------------------------------------------------------------------------|-----------------------------------------------------------------------------------------------------------------------------------------------------|
|    |                                                                                                                                                                                           | No       | Guiding questions                                                     | Activities                                                                 | Outputs                                                                                                                                             |
|    |                                                                                                                                                                                           | 6        | Look at the other group's suggestion and discuss/complement           | Design exercise (group A: primary care case; group B: emergency care case) | advice (created during the design exercise)<br>- Participants' individual take-home messages (shared in the chat during summary/check-out)          |
| 4  | <ul style="list-style-type: none"> <li>- To collaboratively design a proposal for a safety-netting education</li> <li>- To make suggestions for how to deliver content</li> </ul>         | 7        | Draft an educational curriculum (a theory group and a practice group) | Design exercise (group A: theory; group B: practice)                       | - Mindmaps with suggestions for a safety-netting curriculum (created during group exercise)                                                         |
|    |                                                                                                                                                                                           | 8        | Further develop the educational curriculum                            | Design exercise (group A: theory; group B: practice)                       | - Participants' individual summaries of key points (shared in the chat during summary/check-out)                                                    |
| 5  | <ul style="list-style-type: none"> <li>- To further develop the education for clinicians</li> <li>- To together agree on main learning outcomes for a safety-netting education</li> </ul> | 9        | How should a clinician who has taken the course behave?               | Group discussion                                                           | - Participants' individual suggestions of a Swedish term for safety-netting and a name for the course (shared in the chat during summary/check-out) |
|    |                                                                                                                                                                                           | 10       | What kind of situation would you want the role plays to highlight?    | Group discussion (group A: good example, group B: bad example)             |                                                                                                                                                     |
